# Supplementary material for: Characterization of the biosynthetic gene cluster for cryptic phthoxazolin A in Streptomyces avermitilis
Source: PubMed Central journal article supplement (PMC5764310; doi:10.1371/journal.pone.0190973), 2018-01-11
Supplement: pone.0190973.s001.pdf [file pone.0190973.s001.pdf]

**A**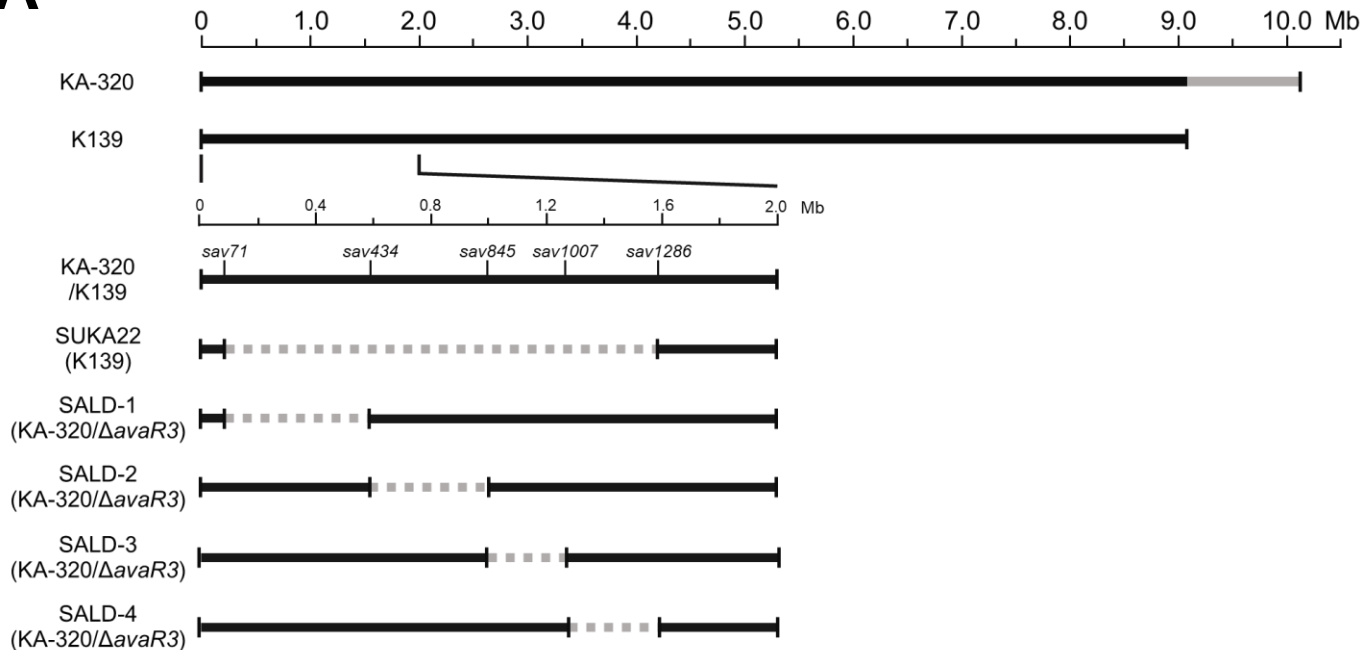**B**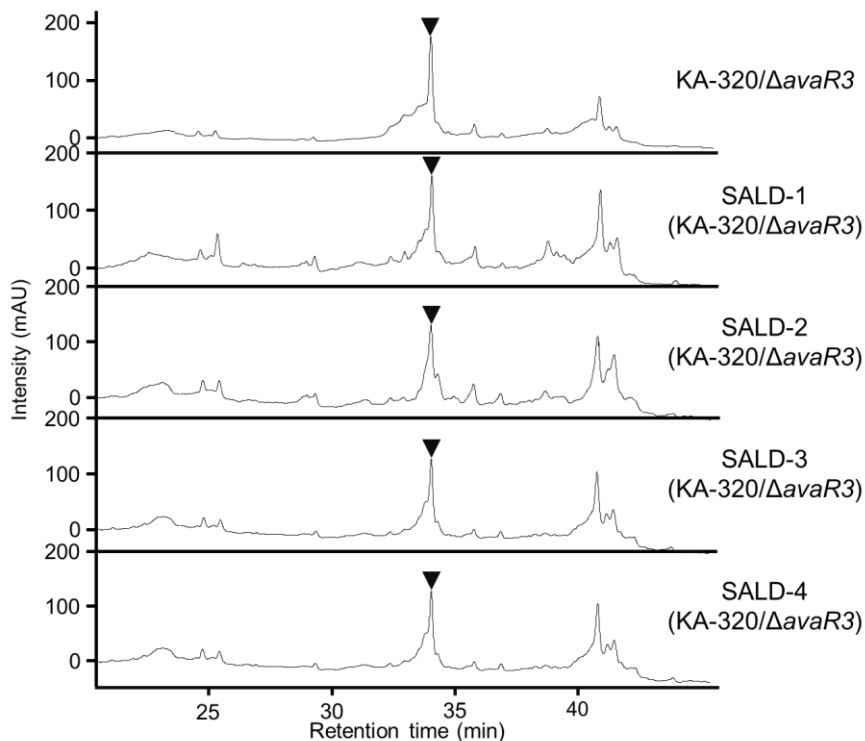

**S1 Fig. Phthoxazolin A production in the SALD mutants.** (A) Schematic representation for the construction of *Streptomyces avermitilis* large-deletion (SALD) mutant strains. The details of the construction are described in the Material and Methods. Gray solid line represents the extra genomic region of *S. avermitilis* KA-320, and gray dashed lines represent the deleted DNA region in the genome. KA-320, *S. avermitilis* KA-320; K139, *S. avermitilis* K139; SUKA22, *S. avermitilis* SUKA22 (K139 as a genetic background). (B) HPLC chromatograms of MeOH extracts from *S. avermitilis* SALD mutants. KA-320/ $\Delta$ *avaR3*, *S. avermitilis*  $\Delta$ *avaR3* (KA-320 as genetic background). mAU, milliabsorbance units at 275 nm. Phthoxazolin A is indicated by an inverted triangle.
