# Supplementary material for: Characterization of the biosynthetic gene cluster for cryptic phthoxazolin A in Streptomyces avermitilis
Source: PubMed Central journal article supplement (PMC5764310; doi:10.1371/journal.pone.0190973), 2018-01-11
Supplement: pone.0190973.s003.pdf [file pone.0190973.s003.pdf]

|                  |          |                 |         |     |              |     |          |     |
|------------------|----------|-----------------|---------|-----|--------------|-----|----------|-----|
|                  |          | *               |         | *   |              | *   |          |     |
| PtxC_KS1         | ININTAC  | <b>C</b>        | STSLVAV | 265 | VEAHGTGTALG  | 401 | NIGHLDT  | 442 |
| PtxF_KS2         | YAVQTAC  | <b>C</b>        | STSLVAV | 265 | VEAHGTATRLG  | 401 | NVGH LDA | 442 |
| PtxF_KS3         | LALDTMC  | <b>C</b>        | SSSLTAL | 265 | VEAHGTGTALG  | 401 | NVGHLES  | 442 |
| PtxF_KS4         | VVVDTAC  | <b>C</b>        | SASLVAL | 265 | VEAHGTGTSLG  | 401 | VIGHLEG  | 442 |
| PtxB_KS5         | LAVDTAC  | <b>C</b>        | SASLTAI | 265 | VEAHGTGTPLG  | 401 | NIGHLES  | 442 |
| PtxB_KS7         | IAVDTAC  | <b>C</b>        | SGSLTAV | 265 | IEAHGTGTALG  | 401 | NIGHLEA  | 442 |
| PtxB_KS8         | VALDTMC  | <b>C</b>        | SSSLVTI | 265 | LEAHGTGTALG  | 401 | NIGHAES  | 442 |
| PtxB_KS9         | VVVDTAC  | <b>C</b>        | SSALVAM | 265 | VEANGSGSTVT  | 401 | NIGHPLA  | 442 |
| PtxH_KS10        | MAVDTMC  | <b>C</b>        | SSSLTSI | 265 | LEAHGTGTSLG  | 401 | NIGHTES  | 442 |
| PtxH_KS11        | LAVDSMCT | <b>C</b>        | SSTMAI  | 265 | VEAAANGTAFS  | 401 | NLGHPEA  | 442 |
| <b>Consensus</b> |          | <b>DXXCSSXL</b> |         |     | <b>HGTGT</b> |     | <b>H</b> |     |

**S3 Fig. Sequence alignment of the conserved motifs in the KS domain core regions from *ptx* PKSs.** The conserved catalytic triad of C-H-H is marked with an asterisk. The numbers indicate amino acid positions within each domain.
