# Supplementary material for: Characterization of the biosynthetic gene cluster for cryptic phthoxazolin A in Streptomyces avermitilis
Source: PubMed Central journal article supplement (PMC5764310; doi:10.1371/journal.pone.0190973), 2018-01-11
Supplement: pone.0190973.s004.pdf [file pone.0190973.s004.pdf]

|                  |                                    |    |
|------------------|------------------------------------|----|
| PtxE_PCPLoading  | FDLGGDSLRL                         | 52 |
| PtxC_ACP1        | FDLGLDSLVL                         | 52 |
| PtxF_ACP2        | DRYGIDSLVI                         | 52 |
| PtxF_ACP3        | DDYGLDSVLV                         | 52 |
| PtxF_ACP4        | ENYGVDSLIV                         | 52 |
| PtxB_ACP5        | ADYGFDSLGS                         | 52 |
| PtxB_PCP6        | GEMGMNSVSL                         | 52 |
| PtxB_ACP7        | DRYGVDSLIT                         | 52 |
| PtxB_ACP8        | QDFGIDSIMV                         | 52 |
| PtxH_ACP9a       | YELGLASADL                         | 52 |
| PtxH_ACP9b       | AEEGFWDWAGL                        | 52 |
| PtxH_ACP10       | ERYGMDSVLA                         | 52 |
| PtxH_ACP11       | FSLGGNSLMA                         | 52 |
| PtxG_PCP12       | FALGGHSLLI                         | 52 |
| PtxG_PCP13       | FDLGGHSLLA                         | 52 |
| <b>Consensus</b> | <b>GX<sup>H</sup><sub>D</sub>S</b> |    |

**S4 Fig. Sequence alignment of the conserved motif in the ACP/PCP domain core regions from *ptx* PKSs and NRPSs.** The Ser residue functioning as the phosphopantetheine-binding site is marked with an asterisk. The numbers indicate amino acid positions within each domain.
