# Supplementary material for: Characterization of the biosynthetic gene cluster for cryptic phthoxazolin A in Streptomyces avermitilis
Source: PubMed Central journal article supplement (PMC5764310; doi:10.1371/journal.pone.0190973), 2018-01-11
Supplement: pone.0190973.s005.pdf [file pone.0190973.s005.pdf]

|           |                                |    |                     |               |           |     |
|-----------|--------------------------------|----|---------------------|---------------|-----------|-----|
| PtxF_KR2  | VTGGAGGLGRAVADRLLS-RADARVLLGR  | 33 | GVVHAAG--VLHDGFALT  | KSEADFAAVLAPK | VAGLR     | 107 |
| PtxF_KR3  | VTGSGAIGRVLAEYLAR-TYRARLVLIGR  | 33 | GVFHLAG--VADDGRATD  | GDRERFAAVLAAK | TRGLV     | 116 |
| PtxF_KR4  | IIGGLGTVGRDTCRHLAQ-TYRAKLVVGR  | 33 | GVVNAAM--VLVDQVVREL | PEAQLRSALDCK  | TESTW     | 116 |
| PtxB_KR5  | LIGGTGGIARELSLDLAR-RHRARLVWFSR | 33 | GVVHAAM--VFDNHPLAEL | DETAFTAATR    | VKIQAT    | 116 |
| PtxB_KR7  | ITGGTGALGLLVAEHIAA-VRRAAGLSGGG | 33 | GILHAAG--VLRDGLLLR  | KDRADAEAVLAAK | VHGTV     | 117 |
| PtxB_KR8  | ITGGTRGIGLLTARHFVAEHGVRKLVLTGR | 35 | GVVHSAGFTDFENPAF    | VVRKPKQSGMDRV | IGPKVFGVD | 135 |
| PtxH_KR10 | LTGGAGGLGLIVAREIAASVRRATVVLTGR | 34 | GILHAAG--VIEDNFVLR  | KSPEELERV     | LAPKVAGLV | 117 |

**consensus**      GXGXXGXXXA

|           |                                          |     |
|-----------|------------------------------------------|-----|
| PtxF_KR2  | ALDAATADDPLDFFVAFSSIAAHIGS--AGQTDYAYANAF | 145 |
| PtxF_KR3  | HLDQLTRNDPLDLFVVFSSVSSLVGD--FGAASYATANRF | 154 |
| PtxF_KR4  | SVLHAVRDESLDFVLFFSSGVAFEGN--HGQAGYAAGCTF | 154 |
| PtxB_KR5  | ALAAVAEERLDFLAFSSAGSFGSF--AGNGAYICASAT   | 154 |
| PtxB_KR7  | LLDEATRDEPLDYFVAFSSAAAAFGN--AGQTDYAFANAF | 155 |
| PtxB_KR8  | TLVEVFRDEPLRLFVLYSSVAATVPALAVGQSDYALANAY | 175 |
| PtxH_KR10 | HLDEASRELPLEVFLCFSSLSGSFGN--PGQADYAAANAF | 155 |

**S5 Fig. Sequence alignment of the conserved motifs in the KR domain core regions from *ptx* PKSs.** The conserved catalytic residues are marked with asterisks. The core region for the NADP(H)-binding motif is underlined. The numbers indicate amino acid positions within each domain. The “LDD” motif for B-type KR domains is shown in a box.
