# Supplementary material for: Characterization of the biosynthetic gene cluster for cryptic phthoxazolin A in Streptomyces avermitilis
Source: PubMed Central journal article supplement (PMC5764310; doi:10.1371/journal.pone.0190973), 2018-01-11
Supplement: pone.0190973.s006.pdf [file pone.0190973.s006.pdf]

|                  |                   |                 |
|------------------|-------------------|-----------------|
|                  | *                 |                 |
| PtxF_DH2         | LADH              | RVGAEPVMPAVG 45 |
| PtxF_DH3         | LRDH              | VIGGRAMLAGAA 45 |
| PtxF_DH4         | LRDH              | VVAGRPILPGVG 45 |
| PtxB_DH7         | LRDH              | VVGGEVLPGVA 45  |
| PtxH_DH9         | LHGH              | VVYGRSLLPGVG 45 |
| PtxH_DH10        | LRDH              | QVRGYRILPGVA 45 |
| <b>consensus</b> | <b>HXXXGXXXXP</b> |                 |

**S6 Fig. Sequence alignment of the conserved motif in the DH domain core regions from *ptx* PKSs.** The proposed active catalytic His residue is marked with an asterisk. The numbers indicate amino acid positions within each domain.
