# Supplementary material for: Characterization of the biosynthetic gene cluster for cryptic phthoxazolin A in Streptomyces avermitilis
Source: PubMed Central journal article supplement (PMC5764310; doi:10.1371/journal.pone.0190973), 2018-01-11
Supplement: pone.0190973.s007.pdf [file pone.0190973.s007.pdf]

**Table S1.**

Oligonucleotides used in this study

| <b>Primer</b>                                     | <b>Sequence (5' – 3')*</b>                               |
|---------------------------------------------------|----------------------------------------------------------|
| <b>For construction of large-deletion mutants</b> |                                                          |
| sav68-up-Fw                                       | ATCATGAAGCTTATCCTCGTCCGGCTGCCCTGGTGGTGGCAG               |
| sav68-up-Re                                       | CCACTAGTGATATCGACGGTCTCCACCAGTGATGCGGACACACG             |
| sav71-dw Fw                                       | GCACTAGTTGGGCACTGTGGAGCGACGTGAGCCGGTG                    |
| sav71-dw-Re                                       | ATCAGTAAGCTTTACACCAGACGCCGGTTCACGTTCCCCGCC               |
| sav432-up-Fw                                      | GAATTCAAGCTTCCCCCTGTCTCCGCACCCGGCATCAGGAGGA              |
| sav434-up-Re                                      | GGACTAGTGGTGGTGACCAGGTACCTGTACAGGAAGCGCTCGCC             |
| sav434-dw-Fw                                      | GAATTCAAGCTTCCCCCTGTCTCCGCACCCGGCATCAGGAGGA              |
| sav434-dw-Re                                      | TAATTCAAGCTTCTGAGGTCCGCAGGCGGGGCGGAGGTCCG                |
| sav845-up-Fw                                      | ATGCAAAGCTTACGACGGAAGGAGCTGACCGCATG                      |
| sav845-up-Re                                      | GGACTAGTGTAATAGGGGTCGTCCACCAGGTCTCGGC                    |
| sav845-dw-Fw                                      | GCACTAGTCGAGCTGGAAGGAGGACACCCGGCGGCATGGAC                |
| sav845-dw-Re                                      | CTGTCCAAGCTTACTGTTGCTCCCGAACGGCAGGTCCC                   |
| sav1007-up-Fw                                     | GCATTCAAGCTTATGCTTTCGCACTCCATCGAGCAC                     |
| sav1007-up-Re                                     | GGACTAGTGGTGATTGTCATCGACAGTTTCACCGTG                     |
| sav1007-dw-Fw                                     | CGACTAGTTCGAGCCGACCTGGCTGACCACCCAGC                      |
| sav1007-dw-Re                                     | GTGCAGAAGCTTGGCGCGGCTGGTGTAGATCCAGTTG                    |
| sav1286-up-Fw                                     | CACTTCAAGCTTCCCTCCGGCATTTCGATGTGCCGCC                    |
| sav1286-up-Re                                     | GGACTAGTGATCATGGTCTTGTCGCCGGGCGCGGCTC                    |
| sav1286-dw-Fw                                     | CGACTAGTCGACGCGCTCAGTGACTCGTTCGCCGC                      |
| sav1286-dw-Re                                     | GAATTCAAGCTTACCTTCGGGCCCCCGGACACCTGG                     |
| wo-mutloxP-SpeI-Fw                                | GCACTAGTGCTCATTTAAATCCGTTGGATACACCAAG                    |
| wo-mutloxP-SpeI-Re                                | GGACTAGTTTAGACATTATTTGCCGGACTACCTTGGTGATCTCGCTTTCACGTAG  |
| mutloxP-SpeI-Fw                                   | GGACTAGTGAGCGACTCGAGTACCGTTCGTATAGCATACATTACGAAGTTATACGG |
| mutloxP-SpeI-Re                                   | CTCGAGACTAGTCTGGTACCGAGCGAACGCGTT                        |
| sav71-test-Fw                                     | GGTCTCGGTCCTGACGGGGATGTCCACCC                            |
| sav71-test-Re                                     | GACGTGTCGCTGAGCCGGTGGAAGGTGAC                            |
| sav434-test-Fw                                    | TTCGCCCGCGCTCACTCCCCGTA CTACC                            |
| sav434-test-Re                                    | GGCTCTCGTTGCAGCCGTAGGTGTTGACCAC                          |
| sav1286-test-Fw                                   | GACGAGGAGCTGCTGCGTCTGTGGG                                |
| sav1286 test-Re                                   | GCGAGACCAGCACGATGCCGACGAG                                |
| sav845 test-Fw                                    | GCTGCGACAGTGAAGGACGATCAGTGA                              |

|                                                                                   |                                                     |
|-----------------------------------------------------------------------------------|-----------------------------------------------------|
| sav845 test- Rw                                                                   | GTCGGCGGAGAAGAACAAGCTGAC                            |
| <b>For construction of <i>ptxA</i> mutant and <i>ptxA</i>-complemented strain</b> |                                                     |
| <i>ptxA</i> -up-Fw                                                                | CGATCCA <u>AGCTT</u> AACGACTGCGTGTGCAGGTCGCCGCG     |
| <i>ptxA</i> -up-Re                                                                | G <u>CACTAGT</u> CTGGAGGGCGCAGCCGCACACCTCATGGAG     |
| <i>ptxA</i> -dw-Re                                                                | G <u>GACTAGT</u> GAAACATGAACACGACGGGGAGGGAATCGGTG   |
| <i>ptxA</i> -dw-Fw                                                                | CAATT <u>CAAGCTT</u> GCTCACCGACCGGCAGGGCCTCGACC     |
| <i>ptzA</i> test-Fw                                                               | CAGTGTGTACGTCCAGACGGTCAGCG                          |
| <i>ptzA</i> test-Re                                                               | GCTCGAACTCAAGGCCGTGGAGTCG                           |
| <i>hph</i> -Fw                                                                    | C <u>GACTAGT</u> CAGTGAGTTCGAGCGACTCGAGTACCGTTC     |
| <i>hph</i> -Re                                                                    | CTCGAG <u>ACTAGT</u> CTGGTACCGAGCGAACGCGTT          |
| <i>ptzA</i> -Fw                                                                   | GCATCTCCTCGCGGGACTGCCTGCG                           |
| <i>ptzA</i> -Re                                                                   | GGCAGGTTGCCGCGTGCGAAGTTG                            |
| <i>ptxA</i> -comp-Fw                                                              | GTGCCGTTGGTAGTGGGAGGTGAATGAGGGCGCCAAGGGCCGCGCAGGC   |
| <i>ptxA</i> -comp-Re                                                              | CTTTAGATTCTAGAGCCCGGCAGGTGCGGTGAGCGGAAGGTACTCAAGCGC |
| <i>apr</i> -Fw                                                                    | CCCCGGCGGTGTGCTG                                    |
| <i>apr</i> -Re                                                                    | GACGTCGCGGTGAGTTCAGGC                               |

---

\*Restriction sites are underlined.
